# Supplementary material for: Structures, processes and outcomes between first referral and referral hospitals in low-income and middle-income countries: a secondary preplanned analysis of the FALCON and ChEETAh randomised trials
Source: PubMed Central journal article supplement — BMJ Glob Health. 2024 Nov 7;9(Suppl 4):e015599. doi: 10.1136/bmjgh-2024-015599 (PMC11552540; doi:10.1136/bmjgh-2024-015599), 2024-11-07

**Table S1.** Summary of survey questions sent to the principal investigators of the FALCON and CHEETAH randomised clinical trials

| <b>No.</b> | <b>Question</b>                                                                                                                         | <b>Definitions</b>      |
|------------|-----------------------------------------------------------------------------------------------------------------------------------------|-------------------------|
| 1.         | Name of hospital                                                                                                                        |                         |
| 2.         | What is the name and full address of your hospital                                                                                      |                         |
| 3.         | Are you a tertiary referral centre                                                                                                      | No / Yes                |
| 4.         | How far is your centre from the nearest tertiary referral centre                                                                        | (miles / kilometres)    |
| 5.         | How many surgical procedures (excluding caesarian sections) are performed annually under spinal or general anesthesia at your hospital? | <200 / 200 - 500 / >500 |
| 6.         | How many full-time surgeons are on staff (excluding trainees)?                                                                          |                         |
| 7.         | Do you have a medical trained anaesthetist (MD)?                                                                                        | No / Yes                |
| 8.         | Do you have an anaesthetic technician/nurse?                                                                                            | No / Yes                |
| 9.         | Do you have a blood bank or blood storage unit in your hospital                                                                         | No / Yes                |
| 10.        | Do you have a laboratory service for 24 hours blood/urine testing                                                                       | No / Yes                |
| 11.        | Do you have ventilated beds outside of the operating theatre                                                                            | No / Yes                |

**Table S2.** Summary of patients included in the study across FALCON and CHEETAH by country

|                | <b>CHEETAH</b> | <b>FALCON</b> |
|----------------|----------------|---------------|
| <b>Benin</b>   | 746 (6.3%)     | 144 (3.8%)    |
| <b>Ghana</b>   | 1,930 (16%)    | 1,282 (34%)   |
| <b>India</b>   | 3,081 (26%)    | 418 (11%)     |
| <b>Mexico</b>  | 670 (5.6%)     | 105 (2.8%)    |
| <b>Nigeria</b> | 2,676 (23%)    | 1,476 (39%)   |
| <b>Rwanda</b>  | 2,763 (23%)    | 366 (9.7%)    |

**Table S3.** Core metrics in all centres involved in FALCON and CHEETAH

| Characteristic                                                                | Surgical Site Infection |                        | p-value <sup>2</sup> | Postoperative mortality             |                                      | p-value <sup>2</sup> |
|-------------------------------------------------------------------------------|-------------------------|------------------------|----------------------|-------------------------------------|--------------------------------------|----------------------|
|                                                                               | No, N = 11848<br>(81%)  | Yes, N = 2797<br>(19%) |                      | No, N = 14421<br>(93%) <sup>1</sup> | Yes, N = 1081<br>(7.0%) <sup>1</sup> |                      |
| <b>Number of surgical procedures, n (%)</b>                                   |                         |                        | <0.001               |                                     |                                      | <0.001               |
| < 200                                                                         | 85 (0.7%)               | 34 (1.2%)              |                      | 116 (0.8%)                          | 17 (1.6%)                            |                      |
| 200-500                                                                       | 2,356 (19.9%)           | 446 (15.9%)            |                      | 2,777 (19.3%)                       | 128 (11.8%)                          |                      |
| >500                                                                          | 9,407 (79.4%)           | 2,317 (82.8%)          |                      | 11,528 (79.9%)                      | 936 (86.6%)                          |                      |
| <b>How many full-time surgeons are on staff</b>                               |                         |                        | <0.001               |                                     |                                      | 0.010                |
| Median (IQR)                                                                  | 16(4.0, 39.0)           | 22(5.0, 40.0)          |                      | 16(4.0, 39.0)                       | 18(4.0, 36.0)                        |                      |
| <b>Do you have a medical trained anaesthetist</b>                             |                         |                        | <0.001               |                                     |                                      | 0.002                |
| No                                                                            | 2,454 (20.7%)           | 412 (14.7%)            |                      | 2,844 (19.7%)                       | 172 (15.9%)                          |                      |
| Yes                                                                           | 9,394 (79.3%)           | 2,385 (85.3%)          |                      | 11,577 (80.3%)                      | 909 (84.1%)                          |                      |
| <b>Do you have an anaesthetic technician/nurse</b>                            |                         |                        | 0.008                |                                     |                                      | 0.2                  |
| No                                                                            | 449 (3.8%)              | 77 (2.8%)              |                      | 516 (3.6%)                          | 31 (2.9%)                            |                      |
| Yes                                                                           | 11,399 (96.2%)          | 2,720 (97.2%)          |                      | 13,905 (96.4%)                      | 1,050 (97.1%)                        |                      |
| <b>Do you have a blood bank or blood storage unit in your hospital, n (%)</b> |                         |                        | <0.001               |                                     |                                      | <0.001               |
| No                                                                            | 1,239 (10.5%)           | 179 (6.4%)             |                      | 1,397 (9.7%)                        | 63 (5.8%)                            |                      |
| Yes                                                                           | 10,609 (89.5%)          | 2,618 (93.6%)          |                      | 13,024 (90.3%)                      | 1,018 (94.2%)                        |                      |
| <b>Do you have ventilated beds outside of the operating theatre, n (%)</b>    |                         |                        | 0.15                 |                                     |                                      | 0.3                  |
| No                                                                            | 2,012 (17.0%)           | 443 (15.8%)            |                      | 2,416 (16.8%)                       | 168 (15.5%)                          |                      |
| Yes                                                                           | 9,836 (83.0%)           | 2,354 (84.2%)          |                      | 12,005 (83.2%)                      | 913 (84.5%)                          |                      |

**Table S4.** Core metrics in all by type of centres involved in FALCON and CHEETAH

| Characteristic                                                                | Surgical Site Infection                  |                                               | Postoperative mortality                  |                                                |
|-------------------------------------------------------------------------------|------------------------------------------|-----------------------------------------------|------------------------------------------|------------------------------------------------|
|                                                                               | Referral, N =<br>2315 (21%) <sup>1</sup> | Non - Referral,<br>N = 482 (14%) <sup>1</sup> | Referral, N =<br>916 (7.6%) <sup>1</sup> | Non - Referral,<br>N = 165 (4.6%) <sup>1</sup> |
| <b>Number of surgical procedures, n (%)</b>                                   |                                          |                                               |                                          |                                                |
| < 200                                                                         | 2 (6.3%)                                 | 32 (37%)                                      | 2 (5.7%)                                 | 15 (14%)                                       |
| 200-500                                                                       | 224 (21%)                                | 222 (13%)                                     | 65 (5.7%)                                | 63 (3.5%)                                      |
| >500                                                                          | 2,089 (21%)                              | 228 (14%)                                     | 849 (7.8%)                               | 87 (5.2%)                                      |
| <b>How many full-time surgeons are on staff</b>                               |                                          |                                               |                                          |                                                |
| Median (IQR)                                                                  | 31 (15, 40)                              | 2.00 (2.00,<br>4.00)                          | 30 (10, 40)                              | 2.00 (2.00,<br>3.00)                           |
| <b>Do you have a medical trained anaesthetist</b>                             |                                          |                                               |                                          |                                                |
| No                                                                            | 191 (18%)                                | 221 (12%)                                     | 82 (7.4%)                                | 90 (4.7%)                                      |
| Yes                                                                           | 2,124 (21%)                              | 261 (16%)                                     | 834 (7.6%)                               | 75 (4.6%)                                      |
| <b>Do you have an anaesthetic technician/nurse</b>                            |                                          |                                               |                                          |                                                |
| No                                                                            | 55 (14%)                                 | 22 (15%)                                      | 27 (6.8%)                                | 4 (2.6%)                                       |
| Yes                                                                           | 2,260 (21%)                              | 460 (14%)                                     | 889 (7.7%)                               | 161 (4.7%)                                     |
| <b>Do you have a blood bank or blood storage unit in your hospital, n (%)</b> |                                          |                                               |                                          |                                                |
| No                                                                            | 7 (30%)                                  | 172 (12%)                                     | 4 (15%)                                  | 59 (4.1%)                                      |
| Yes                                                                           | 2,308 (21%)                              | 310 (15%)                                     | 912 (7.6%)                               | 106 (5.0%)                                     |
| <b>Do you have ventilated beds outside of the operating theatre, n (%)</b>    |                                          |                                               |                                          |                                                |
| No                                                                            | 203 (17%)                                | 240 (19%)                                     | 61 (5.0%)                                | 107 (7.7%)                                     |
| Yes                                                                           | 2,112 (21%)                              | 242 (11%)                                     | 855 (7.9%)                               | 58 (2.7%)                                      |
| <b>Distance from referral Centre</b>                                          |                                          |                                               |                                          |                                                |
| less than 50km                                                                | -                                        | 36 (11%)                                      | -                                        | 6 (1.8%)                                       |
| between 50km to 120km                                                         | -                                        | 90 (14%)                                      | -                                        | 35 (5.1%)                                      |
| between 120km to 218km                                                        | -                                        | 113 (14%)                                     | -                                        | 58 (6.8%)                                      |
| More than 218km                                                               | -                                        | 89 (10%)                                      | -                                        | 19 (2.2%)                                      |

**Table S5.** Core metrics in First referral centres involved in FALCON and CHEETAH

| Characteristic                                                                | Surgical Site Infection |                       | Postoperative mortality            |                                     |
|-------------------------------------------------------------------------------|-------------------------|-----------------------|------------------------------------|-------------------------------------|
|                                                                               | No, N = 2933<br>(86%)   | Yes, N = 482<br>(14%) | No, N = 3396<br>(95%) <sup>1</sup> | Yes, N = 165<br>(4.6%) <sup>1</sup> |
| <b>Number of surgical procedures, n (%)</b>                                   |                         |                       |                                    |                                     |
| < 200                                                                         | 1,508(51.4%)            | 222(46.1%)            | 1,714(50.7%)                       | 63(38.2%)                           |
| 200-500                                                                       | 55(1.9%)                | 32(6.6%)              | 84(2.5%)                           | 15(9.1%)                            |
| >500                                                                          | 1,370(46.7%)            | 228(47.3%)            | 1,580(46.8%)                       | 87(52.7%)                           |
| <b>How many full-time surgeons are on staff</b>                               |                         |                       |                                    |                                     |
| Median (IQR)                                                                  | 2(1.0, 3.0)             | 2(2.0, 4.0)           | 2(1.0, 3.0)                        | 2(2.0, 3.0)                         |
| <b>Do you have a medical trained anaesthetist</b>                             |                         |                       |                                    |                                     |
| No                                                                            | 1,610(54.9%)            | 221(45.9%)            | 1,817(53.8%)                       | 90(54.5%)                           |
| Yes                                                                           | 1,323(45.1%)            | 261(54.1%)            | 1,561(46.2%)                       | 75(45.5%)                           |
| <b>Do you have an anaesthetic technician/nurse</b>                            |                         |                       |                                    |                                     |
| No                                                                            | 124(4.2%)               | 22(4.6%)              | 146(4.3%)                          | 4(2.4%)                             |
| Yes                                                                           | 2,809(95.8%)            | 460(95.4%)            | 3,232(95.7%)                       | 161(97.6%)                          |
| <b>Do you have a blood bank or blood storage unit in your hospital, n (%)</b> |                         |                       |                                    |                                     |
| No                                                                            | 1,223(41.7%)            | 172(35.7%)            | 1,376(40.7%)                       | 59(35.8%)                           |
| Yes                                                                           | 1,710(58.3%)            | 310(64.3%)            | 2,002(59.3%)                       | 106(64.2%)                          |
| <b>Do you have ventilated beds outside of the operating theatre, n (%)</b>    |                         |                       |                                    |                                     |
| No                                                                            | 1,054(35.9%)            | 240(49.8%)            | 1,274(37.7%)                       | 107(64.8%)                          |
| Yes                                                                           | 1,879(64.1%)            | 242(50.2%)            | 2,104(62.3%)                       | 58(35.2%)                           |
| <b>Distance from referral Centre</b>                                          |                         |                       |                                    |                                     |
| less than 50km                                                                | 293(12.6%)              | 36(11.0%)             | 323(12.3%)                         | 6(5.1%)                             |
| between 50km to 120km                                                         | 573(24.6%)              | 90(27.4%)             | 651(24.8%)                         | 35(29.7%)                           |
| between 120km to 218km                                                        | 689(29.6%)              | 113(34.5%)            | 790(30.2%)                         | 58(49.2%)                           |
| More than 218km                                                               | 773(33.2%)              | 89(27.1%)             | 856(32.7%)                         | 19(16.1%)                           |
| Missing                                                                       | 605                     | 154                   | 758                                | 47                                  |

**Table S6.** Summary of hospital-, patient-, and operative level characteristics of patients undergoing major abdominal surgery by **postoperative mortality**

| <b>Characteristic</b>                                   | <b>No, N = 14421<br/>(93%)<sup>1</sup></b> | <b>Yes, N = 1081<br/>(7.0%)<sup>1</sup></b> | <b>p-value<sup>2</sup></b> |
|---------------------------------------------------------|--------------------------------------------|---------------------------------------------|----------------------------|
| <b>Hospital level</b>                                   |                                            |                                             |                            |
| Are you a tertiary referral centre                      |                                            |                                             | <0.001                     |
| Non- referral centre                                    | 3,378 (23%)                                | 165 (15%)                                   |                            |
| Referral centre                                         | 11,043 (77%)                               | 916 (85%)                                   |                            |
| <b>Patient characteristics</b>                          |                                            |                                             |                            |
| Age band                                                |                                            |                                             | <0.001                     |
| Child                                                   | 2,025 (14%)                                | 103 (9.5%)                                  |                            |
| Adult                                                   | 12,396 (86%)                               | 978 (90%)                                   |                            |
| Sex                                                     |                                            |                                             | <0.001                     |
| Male                                                    | 6,613 (46%)                                | 654 (60%)                                   |                            |
| Female                                                  | 7,808 (54%)                                | 427 (40%)                                   |                            |
| What is the patients smoking status?                    |                                            |                                             | <0.001                     |
| Ex-smoker (stopped more than 6 weeks ago)               | 671 (4.7%)                                 | 102 (9.4%)                                  |                            |
| Current smoker or stopped smoking less than 6 weeks ago | 530 (3.7%)                                 | 86 (8.0%)                                   |                            |
| Never smoked                                            | 13,220 (92%)                               | 893 (83%)                                   |                            |
| American Society of Anesthesiologists grade             |                                            |                                             | <0.001                     |
| Grade I                                                 | 7,079 (49%)                                | 198 (18%)                                   |                            |
| Grade II                                                | 4,929 (34%)                                | 302 (28%)                                   |                            |
| Grade III                                               | 1,999 (14%)                                | 388 (36%)                                   |                            |
| Grade IV / V                                            | 413 (2.8%)                                 | 188 (17.3%)                                 |                            |
| (Missing)                                               | 1                                          | 8                                           |                            |
| Does the patient have known diabetes?                   |                                            |                                             | <0.001                     |
| No                                                      | 13,622 (94%)                               | 983 (91%)                                   |                            |
| Yes                                                     | 798 (5.5%)                                 | 98 (9.1%)                                   |                            |
| (Missing)                                               | 1                                          | 0                                           |                            |
| Does the patient have known HIV status?                 |                                            |                                             | 0.002                      |
| Known negative                                          | 7,632 (53%)                                | 529 (49%)                                   |                            |
| Known positive                                          | 233 (1.6%)                                 | 30 (2.8%)                                   |                            |
| Status not known                                        | 6,556 (45%)                                | 522 (48%)                                   |                            |
| <b>Operative characteristics</b>                        |                                            |                                             |                            |
| Timing of surgery                                       |                                            |                                             | <0.001                     |
| Elective (planned admission)                            | 6,169 (43%)                                | 274 (25%)                                   |                            |
| Emergency (unplanned admission)                         | 8,252 (57%)                                | 807 (75%)                                   |                            |
| Indication for surgery                                  |                                            |                                             | <0.001                     |
| Malignant disease                                       | 2,009 (14%)                                | 263 (25%)                                   |                            |
| Benign disease                                          | 11,741 (81%)                               | 744 (69%)                                   |                            |
| Trauma                                                  | 601 (4.2%)                                 | 64 (6.0%)                                   |                            |
| Obstetric                                               | 68 (0.5%)                                  | 2 (0.2%)                                    |                            |
| (Missing)                                               | 2                                          | 8                                           |                            |
| Malignant disease*                                      |                                            |                                             | <0.001                     |
| No                                                      | 12,410 (86%)                               | 810 (75%)                                   |                            |
| Yes                                                     | 2,009 (14%)                                | 263 (25%)                                   |                            |
| (Missing)                                               | 2                                          | 8                                           |                            |
| Operation Type*                                         |                                            |                                             | <0.001                     |
| GI tract                                                | 6,400 (47%)                                | 528 (57%)                                   |                            |
| Non GI tract                                            | 7,218 (53%)                                | 399 (43%)                                   |                            |
| (Missing)                                               | 803                                        | 154                                         |                            |
| Operation                                               |                                            |                                             |                            |
| Appendectomy                                            | 2,725 (19%)                                | 32 (3.0%)                                   |                            |
| Colorectal                                              | 1,659 (12%)                                | 193 (18%)                                   |                            |
| Gynaecology                                             | 3,198 (22%)                                | 26 (2.4%)                                   |                            |
| HPB                                                     | 739 (5.1%)                                 | 40 (3.7%)                                   |                            |
| Other                                                   | 3,229 (22%)                                | 362 (33%)                                   |                            |
| Small bowel                                             | 1,209 (8.4%)                               | 208 (19%)                                   |                            |
| Upper GI                                                | 863 (6.0%)                                 | 200 (19%)                                   |                            |
| Urology                                                 | 791 (5.5%)                                 | 11 (1.0%)                                   |                            |

| Characteristic                                                           | No, N = 14421<br>(93%) <sup>1</sup> | Yes, N = 1081<br>(7.0%) <sup>1</sup> | p-value <sup>2</sup> |
|--------------------------------------------------------------------------|-------------------------------------|--------------------------------------|----------------------|
| Missing                                                                  | 8 (<0.1%)                           | 9 (0.8%)                             |                      |
| Actual intra-operative contamination                                     |                                     |                                      | <0.001               |
| Clean                                                                    | 87 (0.6%)                           | 7 (0.7%)                             |                      |
| Clean-contaminated                                                       | 8,070 (56%)                         | 325 (30%)                            |                      |
| Contaminated                                                             | 3,247 (23%)                         | 280 (26%)                            |                      |
| Dirty                                                                    | 3,013 (21%)                         | 461 (43%)                            |                      |
| (Missing)                                                                | 4                                   | 8                                    |                      |
| Contamination*                                                           |                                     |                                      | <0.001               |
| Clean-contaminated                                                       | 8,157 (57%)                         | 332 (31%)                            |                      |
| Contaminated                                                             | 3,247 (23%)                         | 280 (26%)                            |                      |
| Dirty                                                                    | 3,013 (21%)                         | 461 (43%)                            |                      |
| (Missing)                                                                | 4                                   | 8                                    |                      |
| What was the operative approach?                                         |                                     |                                      | <0.001               |
| Open midline                                                             | 8,641 (60%)                         | 973 (91%)                            |                      |
| Open non-midline                                                         | 5,498 (38%)                         | 95 (8.9%)                            |                      |
| Laparoscopic                                                             | 121 (0.8%)                          | 0 (0%)                               |                      |
| Laparoscopic converted to open                                           | 158 (1.1%)                          | 5 (0.5%)                             |                      |
| (Missing)                                                                | 3                                   | 8                                    |                      |
| Operation Approach*                                                      |                                     |                                      | <0.001               |
| Open midline                                                             | 8,641 (60%)                         | 973 (91%)                            |                      |
| Laparoscopic                                                             | 279 (1.9%)                          | 5 (0.5%)                             |                      |
| Open non-midline                                                         | 5,498 (38%)                         | 95 (8.9%)                            |                      |
| (Missing)                                                                | 3                                   | 8                                    |                      |
| Was WHO Surgical safety checklist used?                                  |                                     |                                      | >0.9                 |
| Yes                                                                      | 13,657 (95%)                        | 1,016 (95%)                          |                      |
| No                                                                       | 763 (5.3%)                          | 57 (5.3%)                            |                      |
| (Missing)                                                                | 1                                   | 8                                    |                      |
| Was intraoperative pulse oximetry used?                                  |                                     |                                      | 0.5                  |
| No                                                                       | 89 (0.6%)                           | 5 (0.5%)                             |                      |
| Yes                                                                      | 14,332 (99%)                        | 1,068 (100%)                         |                      |
| (Missing)                                                                | 0                                   | 8                                    |                      |
| Up to 60 minutes prior to incision, were prophylactic antibiotics given? |                                     |                                      | >0.9                 |
| No                                                                       | 393 (2.7%)                          | 29 (2.7%)                            |                      |
| Yes                                                                      | 14,027 (97%)                        | 1,044 (97%)                          |                      |
| (Missing)                                                                | 1                                   | 8                                    |                      |
| Hair removal at site of wound ?                                          |                                     |                                      | 0.009                |
| No hair at site of wound                                                 | 6,517 (45%)                         | 510 (48%)                            |                      |
| In theatre, electric                                                     | 550 (3.8%)                          | 35 (3.3%)                            |                      |
| In theatre, razor/blade                                                  | 1,355 (9.4%)                        | 120 (11%)                            |                      |
| Before theatre arrival                                                   | 4,531 (31%)                         | 287 (27%)                            |                      |
| Not done                                                                 | 1,464 (10%)                         | 121 (11%)                            |                      |
| (Missing)                                                                | 4                                   | 8                                    |                      |
| Glove and instrument change                                              |                                     |                                      | 0.2                  |
| No                                                                       | 9,504 (66%)                         | 732 (68%)                            |                      |
| Yes                                                                      | 4,917 (34%)                         | 349 (32%)                            |                      |

<sup>1</sup>n (%)

<sup>2</sup>Pearson's Chi-squared test; Fisher's exact test

**Table S7.** Summary of hospital-, patient-, and operative level characteristics of patients undergoing major abdominal surgery by **surgical site infection**

| <b>Characteristic</b>                                   | <b>No, N = 11848<br/>(81%)</b> | <b>Yes, N = 2797<br/>(19%)</b> | <b>p-value<sup>2</sup></b> |
|---------------------------------------------------------|--------------------------------|--------------------------------|----------------------------|
| <b>Hospital level</b>                                   |                                |                                |                            |
| Are you a tertiary referral centre                      |                                |                                | <0.001                     |
| Non- referral centre                                    | 2,933 (25%)                    | 482 (17%)                      |                            |
| Referral centre                                         | 8,915 (75%)                    | 2,315 (83%)                    |                            |
| <b>Patient characteristics</b>                          |                                |                                | 0.014                      |
| <b>Age band</b>                                         |                                |                                |                            |
| Child                                                   | 1,602 (14%)                    | 428 (15%)                      |                            |
| Adult                                                   | 10,246 (86%)                   | 2,369 (85%)                    | <0.001                     |
| <b>Sex</b>                                              |                                |                                |                            |
| Male                                                    | 5,291 (45%)                    | 1,463 (52%)                    |                            |
| Female                                                  | 6,557 (55%)                    | 1,334 (48%)                    | <0.001                     |
| <b>What is the patients smoking status?</b>             |                                |                                |                            |
| Ex-smoker (stopped more than 6 weeks ago)               | 550 (4.6%)                     | 150 (5.4%)                     |                            |
| Current smoker or stopped smoking less than 6 weeks ago | 394 (3.3%)                     | 160 (5.7%)                     |                            |
| Never smoked                                            | 10,904 (92%)                   | 2,487 (89%)                    | <0.001                     |
| <b>American Society of Anesthesiologists grade</b>      |                                |                                |                            |
| Grade I                                                 | 6,135 (52%)                    | 980 (35%)                      |                            |
| Grade II                                                | 4,030 (34%)                    | 973 (35%)                      |                            |
| Grade III                                               | 1,404 (12%)                    | 679 (24%)                      |                            |
| Grade IV / V                                            | 211 (1.8%)                     | 133 (4.8%)                     |                            |
| (Missing)                                               | 68 (0.6%)                      | 32 (1.1%)                      | 0.002                      |
| <b>Does the patient have known diabetes?</b>            |                                |                                |                            |
| No                                                      | 11,215 (95%)                   | 2,605 (93%)                    |                            |
| Yes                                                     | 632 (5.3%)                     | 192 (6.9%)                     |                            |
| (Missing)                                               | 1                              | 0                              | 0.3                        |
| <b>Does the patient have known HIV status?</b>          |                                |                                |                            |
| Known negative                                          | 6,314 (53%)                    | 1,442 (52%)                    |                            |
| Known positive                                          | 196 (1.7%)                     | 47 (1.7%)                      |                            |
| Status not known                                        | 5,338 (45%)                    | 1,308 (47%)                    | <0.001                     |
| <b>Operative characteristics</b>                        |                                |                                |                            |
| <b>Timing of surgery</b>                                |                                |                                |                            |
| Elective (planned admission)                            | 5,287 (45%)                    | 949 (34%)                      |                            |
| Emergency (unplanned admission)                         | 6,561 (55%)                    | 1,848 (66%)                    | 0.14                       |
| <b>Indication for surgery</b>                           |                                |                                |                            |
| Malignant disease                                       | 1,657 (14%)                    | 403 (14%)                      |                            |
| Benign disease                                          | 487 (4.1%)                     | 121 (4.3%)                     |                            |
| Trauma                                                  | 48 (0.4%)                      | 20 (0.7%)                      |                            |
| Obstetric                                               | 1                              | 2                              | 0.6                        |
| (Missing)                                               | 10,190 (86%)                   | 2,392 (86%)                    |                            |
| <b>Malignant disease*</b>                               |                                |                                |                            |
| No                                                      | 1,657 (14%)                    | 403 (14%)                      |                            |
| Yes                                                     | 1                              | 2                              | <0.001                     |
| (Missing)                                               | 5,204 (46%)                    | 1,291 (51%)                    |                            |



| <b>Characteristic</b>                                                    | <b>No, N = 11848<br/>(81%)</b> | <b>Yes, N = 2797<br/>(19%)</b> | <b>p-value<sup>2</sup></b> |
|--------------------------------------------------------------------------|--------------------------------|--------------------------------|----------------------------|
| Operation Type*                                                          | 6,087 (54%)                    | 1,216 (49%)                    |                            |
| GI tract                                                                 | 557                            | 290                            |                            |
| Non-GI tract                                                             |                                |                                | <0.001                     |
| (Missing)                                                                | 2,933 (25%)                    | 482 (17%)                      |                            |
| Operation                                                                |                                |                                |                            |
| Appendectomy                                                             | 2,360 (20%)                    | 359 (13%)                      |                            |
| Colorectal                                                               | 1,252 (11%)                    | 452 (16%)                      |                            |
| Gynaecology                                                              | 2,853 (24%)                    | 345 (12%)                      |                            |
| HPB                                                                      | 634 (5.4%)                     | 116 (4.1%)                     |                            |
| Other                                                                    | 2,551 (22%)                    | 760 (27%)                      |                            |
| Small bowel                                                              | 809 (6.8%)                     | 451 (16%)                      |                            |
| Upper GI                                                                 | 701 (5.9%)                     | 200 (7.2%)                     |                            |
| Urology                                                                  | 683 (5.8%)                     | 111 (4.0%)                     |                            |
| Missing                                                                  | 5 (<0.1%)                      | 3 (0.1%)                       |                            |
| Actual intra-operative contamination                                     |                                |                                | <0.001                     |
| Clean                                                                    | 79 (0.7%)                      | 11 (0.4%)                      |                            |
| Clean-contaminated                                                       | 7,107 (60%)                    | 1,025 (37%)                    |                            |
| Contaminated                                                             | 2,634 (22%)                    | 672 (24%)                      |                            |
| Dirty                                                                    | 2,027 (17%)                    | 1,087 (39%)                    |                            |
| (Missing)                                                                | 1                              | 2                              |                            |
| Contamination*                                                           |                                |                                | <0.001                     |
| Clean-contaminated                                                       | 7,186 (61%)                    | 1,036 (37%)                    |                            |
| Contaminated                                                             | 2,634 (22%)                    | 672 (24%)                      |                            |
| Dirty                                                                    | 2,027 (17%)                    | 1,087 (39%)                    |                            |
| (Missing)                                                                | 1                              | 2                              |                            |
| What was the operative approach?                                         |                                |                                | <0.001                     |
| Open midline                                                             | 6,739 (57%)                    | 2,121 (76%)                    |                            |
| Open non-midline                                                         | 4,869 (41%)                    | 632 (23%)                      |                            |
| Laparoscopic                                                             | 102 (0.9%)                     | 19 (0.7%)                      |                            |
| Laparoscopic converted to open                                           | 137 (1.2%)                     | 23 (0.8%)                      |                            |
| (Missing)                                                                | 1                              | 2                              |                            |
| Operation Approach*                                                      |                                |                                | <0.001                     |
| Open midline                                                             | 6,739 (57%)                    | 2,121 (76%)                    |                            |
| Laparoscopic                                                             | 239 (2.0%)                     | 42 (1.5%)                      |                            |
| Open non-midline                                                         | 4,869 (41%)                    | 632 (23%)                      |                            |
| (Missing)                                                                | 1                              | 2                              |                            |
| Was WHO Surgical safety checklist used?                                  |                                |                                | <0.001                     |
| Yes                                                                      | 11,289 (95%)                   | 2,579 (92%)                    |                            |
| No                                                                       | 558 (4.7%)                     | 218 (7.8%)                     |                            |
| (Missing)                                                                | 1                              | 0                              |                            |
| Was intraoperative pulse oximetry used?                                  |                                |                                | 0.4                        |
| No                                                                       | 70 (0.6%)                      | 20 (0.7%)                      |                            |
| Yes                                                                      | 11,778 (99%)                   | 2,777 (99%)                    |                            |
| Up to 60 minutes prior to incision, were prophylactic antibiotics given? |                                |                                | <0.001                     |
| No                                                                       | 346 (2.9%)                     | 50 (1.8%)                      |                            |
| Yes                                                                      | 11,501 (97%)                   | 2,747 (98%)                    |                            |
| (Missing)                                                                | 1                              | 0                              |                            |

| <b>Characteristic</b>           | <b>No, N = 11848<br/>(81%)</b> | <b>Yes, N = 2797<br/>(19%)</b> | <b>p-value<sup>2</sup></b> |
|---------------------------------|--------------------------------|--------------------------------|----------------------------|
| Hair removal at site of wound ? |                                |                                | <0.001                     |
| No hair at site of wound        | 5,351 (45%)                    | 1,267 (45%)                    |                            |
| In theatre, electric            | 438 (3.7%)                     | 126 (4.5%)                     |                            |
| In theatre, razor/blade         | 1,067 (9.0%)                   | 313 (11%)                      |                            |
| Before theatre arrival          | 3,750 (32%)                    | 847 (30%)                      |                            |
| Not done                        | 1,239 (10%)                    | 243 (8.7%)                     |                            |
| (Missing)                       | 3                              | 1                              |                            |
| Glove and instrument change     |                                |                                | <0.001                     |
| No                              | 7,583 (64%)                    | 2,083 (74%)                    |                            |
| Yes                             | 4,265 (36%)                    | 714 (26%)                      |                            |

<sup>1</sup>n (%)

<sup>2</sup>Pearson's Chi-squared test; Fisher's exact test

**Supplementary Figure 1.** Multilevel adjusted regression model on association between referral status and postoperative surgical site infection within 30-days in patients undergoing major abdominal surgery

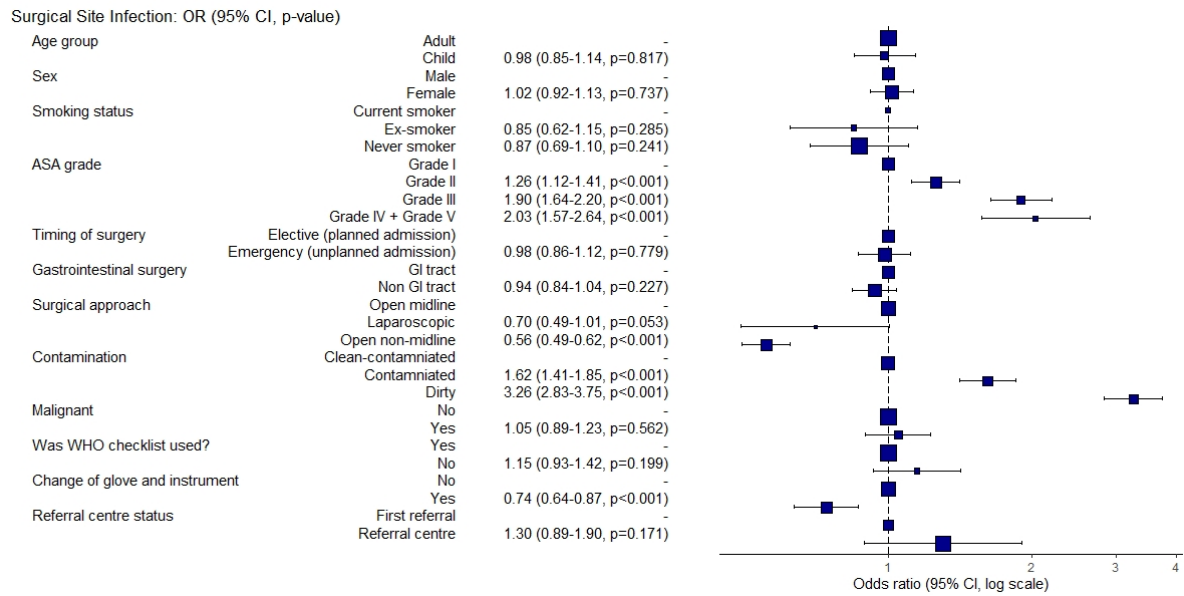

Supplement: bmjgh-9-Suppl_4-s001.pdf [file bmjgh-9-Suppl_4-s001.pdf]
